# Supplementary material for: Community Health Impacts of the Trident Copper Mine Project in Northwestern Zambia: Results from Repeated Cross-Sectional Surveys
Source: PubMed Central journal article supplement (PMC7277077; doi:10.3390/ijerph17103633), 2020-05-21
Supplement: ijerph-17-03633-s001.pdf [file ijerph-17-03633-s001.pdf]

# **Community Health Impacts of the Trident Copper Mine Project in Northwestern Zambia: Results from Repeated Cross-Sectional Surveys**

**Astrid M. Knoblauch** <sup>1,2,\*</sup>, **Andrea Farnham** <sup>1,2</sup>, **Hyacinthe R. Zabré** <sup>1,2</sup>, **Milka Owuor** <sup>3</sup>, **Colleen Archer** <sup>4</sup>, **Kennedy Nduna** <sup>5</sup>, **Marcus Chisanga** <sup>6</sup>, **Leonard Zulu** <sup>7</sup>, **Gertrude Musunka** <sup>6</sup>, **Jürg Utzinger** <sup>1,2</sup>, **Mark J. Divall** <sup>3</sup>, **Günther Fink** <sup>1,2</sup> and **Mirko S. Winkler** <sup>1,2</sup>

<sup>1</sup> Swiss Tropical and Public Health Institute, P.O. Box, 4002 Basel, Switzerland; [andrea.farnham@swisstph.ch](mailto:andrea.farnham@swisstph.ch) (A.F.); [raogohyacinthe.zabre@swisstph.ch](mailto:raogohyacinthe.zabre@swisstph.ch) (H.R.Z.); [juerg.utzinger@swisstph.ch](mailto:juerg.utzinger@swisstph.ch) (J.U.); [guenther.fink@swisstph.ch](mailto:guenther.fink@swisstph.ch) (G.F.); [mirko.winkler@swisstph.ch](mailto:mirko.winkler@swisstph.ch) (M.S.W.)

<sup>2</sup> University of Basel, P.O. Box, 4001 Basel, Switzerland

<sup>3</sup> Shape Consulting, P.O. Box 602, St Peter Port GY1, Guernsey, UK; [mowuor@shapeconsulting.org](mailto:mowuor@shapeconsulting.org) (M.O.); [mdivall@shapeconsulting.org](mailto:mdivall@shapeconsulting.org) (M.J.D.)

<sup>4</sup> Pollution Research Group, Department of Engineering, University of KwaZulu-Natal, 4041 Durban, South Africa; [archerc@ukzn.ac.za](mailto:archerc@ukzn.ac.za)

<sup>5</sup> Nvumabaranda Public Health Services, Ndola, Zambia; [kennedy.nduna@yahoo.com](mailto:kennedy.nduna@yahoo.com)

<sup>6</sup> First Quantum Minerals Limited, Lusaka, Zambia; [marcus.chisanga@fqml.com](mailto:marcus.chisanga@fqml.com) (M.C.); [gertrude.musunka@fqml.com](mailto:gertrude.musunka@fqml.com) (G.M.)

<sup>7</sup> Independent researcher, Lusaka, Zambia; [leonardzulu@gmail.com](mailto:leonardzulu@gmail.com)

\* Correspondence: [astrid.knoblauch@swisstph.ch](mailto:astrid.knoblauch@swisstph.ch)

Received: 23 April 2020; Accepted: 19 May 2020; Published: date

**Table S1.** Vector control and *Plasmodium falciparum* parasitaemia indicators, Trident project, Zambia (2011, 2015, 2019).

|                                                                                   | n   | 2011 BHS<br>(%; 95% CI) | n   | 2015 FUHS<br>(%; 95% CI) | n   | 2019 FUHS<br>(%; 95% CI) | Interaction between Year (2011<br>vs. 2019) and Impact Status |         |
|-----------------------------------------------------------------------------------|-----|-------------------------|-----|--------------------------|-----|--------------------------|---------------------------------------------------------------|---------|
|                                                                                   |     |                         |     |                          |     |                          | OR (95% CI)                                                   | p-Value |
| <b>Households With at Least One Bednet</b>                                        |     |                         |     |                          |     |                          | 0.58 (0.36–1.06)                                              | 0.080   |
| Total impacted                                                                    | 251 | 35.1 (29.1–41.3)        | 353 | 80.7 (76.2–84.7)         | 351 | 72.4 (67.4–77.0)         |                                                               |         |
| Total comparison                                                                  | 29  | 24.1 (10.3–43.5)        | 128 | 77.3 (69.1–84.3)         | 158 | 68.4 (60.5–75.5)         |                                                               |         |
| Total overall                                                                     | 280 | 33.9 (28.4–39.8)        | 481 | 79.8 (76.0–83.3)         | 509 | 71.1 (67.0–75.0)         |                                                               |         |
| <b>Children 6–59 Months Sleeping Under a Bednet</b>                               |     |                         |     |                          |     |                          | 1.05 (0.52–2.09)                                              | 0.902   |
| Total impacted                                                                    | 415 | 28.0 (23.7–32.5)        | 534 | 60.5 (56.2–64.7)         | 566 | 52.5 (48.3–56.7)         |                                                               |         |
| Total comparison                                                                  | 42  | 28.6 (15.7–44.6)        | 237 | 56.5 (50.0–62.9)         | 268 | 52.6 (46.4–58.7)         |                                                               |         |
| Total overall                                                                     | 457 | 28.0 (23.9–32.4)        | 771 | 59.3 (55.7–62.8)         | 834 | 52.5 (49.1–56.0)         |                                                               |         |
| <b>Households Sprayed in the 12 Months Preceding the Survey</b>                   |     |                         |     |                          |     |                          | no data for 2011                                              |         |
| Total impacted                                                                    |     | n/m                     | 354 | 69.8 (64.7–74.5)         | 351 | 81.8 (77.3–85.7)         |                                                               |         |
| Total comparison                                                                  |     | n/m                     | 128 | 28.9 (21.1–37.6)         | 158 | 88.6 (82.6–93.1)         |                                                               |         |
| Total overall                                                                     |     | n/m                     | 482 | 58.9 (54.4–63.4)         | 509 | 83.9 (80.4–87.0)         |                                                               |         |
| <b>Prevalence of <i>Plasmodium falciparum</i> malaria in children 6-59 months</b> |     |                         |     |                          |     |                          | 1.18 (0.55–2.50)                                              | 0.672   |
| Total impacted                                                                    | 418 | 17.5 (13.9–21.5)        | 544 | 30.7 (26.8–34.8)         | 566 | 39.8 (35.7–43.9)         |                                                               |         |
| Total comparison                                                                  | 41  | 34.1 (20.0–50.6)        | 237 | 55.3 (48.7–61.8)         | 268 | 57.8 (51.7–63.8)         |                                                               |         |
| Total overall                                                                     | 459 | 19.0 (15.5–22.8)        | 781 | 38.2 (34.7–41.7)         | 834 | 45.6 (42.1–49.0)         |                                                               |         |

BHS, baseline health survey; CI, confidence interval; FUHS, follow-up health survey; n/m, not measured

**Table S2.** Nutritional indicators and anaemia, Trident project, Zambia (2011, 2015, 2019).

|                                                                                | n   | 2011 BHS<br>(%; 95% CI) | n   | 2015 FUHS<br>(%; 95% CI) | n   | 2019 FUHS<br>(%; 95% CI) | Interaction Between Year (2011<br><i>vs.</i> 2019) and Impact Status |                 |
|--------------------------------------------------------------------------------|-----|-------------------------|-----|--------------------------|-----|--------------------------|----------------------------------------------------------------------|-----------------|
|                                                                                |     |                         |     |                          |     |                          | OR (95% CI)                                                          | <i>p</i> -Value |
| <b>Prevalence of Wasting (Low Weight-for-height) in Children 0–59 Months</b>   |     |                         |     |                          |     |                          | 0.59 (0.06–6.06)                                                     | 0.650           |
| Total impacted                                                                 | 436 | 1.8 (0.8–3.6)           | 633 | 0.8 (0.3–1.8)            | 609 | 1.3 (0.6–2.6)            |                                                                      |                 |
| Total comparison                                                               | 51  | 2.0 (0.1–10.4)          | 256 | 0.8 (0.1–2.8)            | 295 | 2.4 (1.0–4.8)            |                                                                      |                 |
| Total overall                                                                  | 487 | 1.8 (0.8–3.5)           | 889 | 0.8 (0.3–1.6)            | 904 | 1.7 (1.0–2.7)            |                                                                      |                 |
| <b>Prevalence of Stunting (Low Height-for-age) in Children 0–59 Months</b>     |     |                         |     |                          |     |                          | 0.52 (0.27–1.01)                                                     | 0.054           |
| Total impacted                                                                 | 436 | 49.5 (44.8–54.3)        | 633 | 36.7 (32.9–40.5)         | 609 | 27.9 (24.4–31.7)         |                                                                      |                 |
| Total comparison                                                               | 51  | 41.2 (27.6–55.8)        | 265 | 46.3 (40.7–52.0)         | 295 | 34.6 (29.2–40.3)         |                                                                      |                 |
| Total overall                                                                  | 487 | 48.7 (44.1–53.2)        | 889 | 39.9 (36.7–43.1)         | 904 | 30.0 (27.1–33.2)         |                                                                      |                 |
| <b>Prevalence of Underweight (Low Weight-for-age) in Children 0–59 Months</b>  |     |                         |     |                          |     |                          | 0.39 (0.12–1.22)                                                     | 0.106           |
| Total impacted                                                                 | 436 | 13.1 (10.1–16.6)        | 633 | 7.6 (5.6–9.9)            | 609 | 8.7 (6.6–11.2)           |                                                                      |                 |
| Total comparison                                                               | 51  | 7.8 (2.2–18.9)          | 256 | 10.8 (7.6–14.8)          | 295 | 12.2 (8.7–16.5)          |                                                                      |                 |
| Total overall                                                                  | 487 | 12.5 (9.7–15.8)         | 889 | 8.6 (6.9–10.6)           | 904 | 9.8 (8.0–12.0)           |                                                                      |                 |
| <b>Prevalence of Anaemia (Haemoglobin &lt;11 g/dl) in Children 6–59 Months</b> |     |                         |     |                          |     |                          | 1.5 (0.73–3.09)                                                      | 0.268           |
| Total impacted                                                                 | 418 | 46.4 (41.6–51.3)        | 547 | 40.6 (36.5–44.9)         | 566 | 44.2 (40.0–48.4)         |                                                                      |                 |
| Total comparison                                                               | 42  | 64.3 (48.0–78.4)        | 237 | 48.9 (42.4–55.5)         | 268 | 52.2 (46.1–58.4)         |                                                                      |                 |
| Total overall                                                                  | 460 | 48.0 (43.4–52.7)        | 781 | 43.1 (39.6–46.7)         | 834 | 46.8 (43.3–50.2)         |                                                                      |                 |

BHS, baseline health survey; CI, confidence interval; FUHS, follow-up health survey

**Table S3.** Schistosomiasis and soil-transmitted helminths indicators in school attendees aged 9-14 years, Trident project, Zambia (2011, 2015, 2019).

|                                                         | n   | 2011 BHS<br>(%; 95% CI) | n   | 2015 FUHS<br>(%; 95% CI) | n   | 2019 FUHS<br>(%; 95% CI) | Interaction between year (2011<br>vs. 2019) and impact status                           |         |
|---------------------------------------------------------|-----|-------------------------|-----|--------------------------|-----|--------------------------|-----------------------------------------------------------------------------------------|---------|
|                                                         |     |                         |     |                          |     |                          | OR (95% CI)                                                                             | p-value |
| <b>Prevalence of <i>Schistosomiasis haematobium</i></b> |     |                         |     |                          |     |                          | 2.28 (0.88-5.91)                                                                        | 0.091   |
| Total impacted                                          | 278 | 19.4 (14.9–24.8)        | 328 | 11.9 (8.6–15.9)          | 330 | 10.0 (7.0–13.8)          |                                                                                         |         |
| Total comparison                                        | 34  | 73.5 (55.6–87.1)        | 120 | 35.0 (26.5–44.2)         | 150 | 36.0 (28.3–44.2)         |                                                                                         |         |
| Total overall                                           | 312 | 25.3 (20.8–30.5)        | 448 | 18.1 (14.6–22.0)         | 480 | 18.1 (14.8–21.9)         |                                                                                         |         |
| <b>Prevalence of <i>Schistosomiasis mansoni</i></b>     |     |                         |     |                          |     |                          | Interaction model was unable to be adjusted for year and impact due to 0.0% prevalence. |         |
| Total impacted                                          | 276 | 1.1 (0.2–3.1)           | 328 | 8.2 (5.5–11.8)           | 330 | 7.6 (5.0–11.0)           |                                                                                         |         |
| Total comparison                                        | 34  | 0.0                     | 120 | 0.8 (0.0–4.6)            | 150 | 0.0 (-)                  |                                                                                         |         |
| Total overall                                           | 310 | 1.0 (0.2–2.8)           | 448 | 6.3 (4.2–8.9)            | 480 | 5.2 (3.4–7.6)            |                                                                                         |         |
| <b>Prevalence of <i>Ascaris lumbricoides</i></b>        |     |                         |     |                          |     |                          | Interaction model was unable to be adjusted for year and impact due to 0.0% prevalence. |         |
| Total impacted                                          | 276 | 0.7 (0.0–2.6)           | 328 | 1.8 (0.7–3.9)            | 330 | 0.0                      |                                                                                         |         |
| Total comparison                                        | 34  | 0.0                     | 120 | 0.0                      | 150 | 0.0                      |                                                                                         |         |
| Total overall                                           | 310 | 0.6 (0.0–2.3)           | 448 | 1.3 (0.5–2.9)            | 480 | 0.0                      |                                                                                         |         |
| <b>Prevalence of <i>Trichuris trichiura</i></b>         |     |                         |     |                          |     |                          | Interaction model was unable to be adjusted for year and impact due to 0.0% prevalence. |         |
| Total impacted                                          | 276 | 8.3 (5.4–12.2)          | 328 | 6.7 (4.3–10.0)           | 330 | 3.0 (1.5–5.5)            |                                                                                         |         |
| Total comparison                                        | 34  | 0.0                     | 120 | 10.8 (5.9–17.8)          | 150 | 8.7 (4.7–14.4)           |                                                                                         |         |
| Total overall                                           | 310 | 7.4 (4.8–10.9)          | 448 | 7.8 (5.5–10.7)           | 480 | 4.8 (3.1–7.1)            |                                                                                         |         |
| <b>Prevalence of <i>hookworm</i></b>                    |     |                         |     |                          |     |                          | 0.27 (0.11-0.64)                                                                        | 0.003   |
| Total impacted                                          | 276 | 62.7 (56.7–68.4)        | 328 | 56.1 (50.5–61.5)         | 330 | 13.0 (9.6–17.1)          |                                                                                         |         |
| Total comparison                                        | 34  | 58.8 (40.7–75.4)        | 120 | 73.3 (64.5–81.0)         | 150 | 32.0 (24.6–40.1)         |                                                                                         |         |
| Total overall                                           | 310 | 62.3 (56.6–67.7)        | 448 | 60.7 (56.0–65.3)         | 480 | 19.0 (15.5–22.8)         |                                                                                         |         |
| <b>Proportion of Children Without Any Parasites</b>     |     |                         |     |                          |     |                          | 0.84 (0.27-2.66)                                                                        | 0.771   |
| Total impacted                                          | 276 | 29.4 (24.1–35.1)        | 328 | 35.7 (30.5–41.1)         | 330 | 70.3 (65.1–75.2)         |                                                                                         |         |
| Total comparison                                        | 34  | 11.8 (3.3–27.5)         | 120 | 14.2 (8.5–21.7)          | 150 | 47.3 (39.1–55.6)         |                                                                                         |         |
| Total overall                                           | 310 | 27.5 (22.6–32.8)        | 448 | 29.9 (25.7–34.4)         | 480 | 63.1 (58.6–67.5)         |                                                                                         |         |

BHS, baseline health survey; CI, confidence interval; FUHS, follow-up health survey

**Table S4.** Women's health indicators, Trident project, Zambia (2011, 2015, 2019).

|                                                                                                       | n   | 2011 BHS<br>(%; 95% CI) | n   | 2015 FUHS<br>(%; 95% CI) | n   | 2019 FUHS<br>(%; 95% CI) | Interaction between year (2011<br><i>vs.</i> 2019) and impact status |                 |
|-------------------------------------------------------------------------------------------------------|-----|-------------------------|-----|--------------------------|-----|--------------------------|----------------------------------------------------------------------|-----------------|
|                                                                                                       |     |                         |     |                          |     |                          | OR (95% CI)                                                          | <i>p</i> -Value |
| <b>Prevalence of Mothers 15–49 Years that Delivered the Last Born Child in a Health Facility</b>      |     |                         |     |                          |     |                          | 0.46 (0.15–1.43)                                                     | 0.178           |
| Total impacted                                                                                        | 282 | 64.9 (59.1–70.4)        | 432 | 83.0 (79.1–86.4)         | 416 | 95.0 (92.4–96.8)         |                                                                      |                 |
| Total comparison                                                                                      | 31  | 54.8 (36.0–72.7)        | 148 | 78.4 (70.9–84.7)         | 185 | 96.2 (92.4–98.5)         |                                                                      |                 |
| Total overall                                                                                         | 319 | 63.9 (58.4–69.2)        | 583 | 81.8 (78.4–84.9)         | 601 | 95.3 (93.3–96.9)         |                                                                      |                 |
| <b>Prevalence of Underweight in Women 15–49 Years</b>                                                 |     |                         |     |                          |     |                          | no data for 2011                                                     |                 |
| Total impacted                                                                                        |     | n/m                     | 429 | 7.9 (5.6–10.9)           | 416 | 9.9 (7.2–13.1)           |                                                                      |                 |
| Total comparison                                                                                      |     | n/m                     | 148 | 15.5 (10.1–22.4)         | 185 | 11.9 (7.6–17.4)          |                                                                      |                 |
| Total overall                                                                                         |     | n/m                     | 577 | 9.9 (7.6–12.6)           | 601 | 10.5 (8.1–13.2)          |                                                                      |                 |
| <b>Prevalence of Anaemia in Women 15–49 Years (Hb &lt;11 g/dl Pregnant; &lt;12 g/dl Non-pregnant)</b> |     |                         |     |                          |     |                          | 1.42 (0.54–3.75)                                                     | 0.478           |
| Total impacted                                                                                        | 288 | 17.0 (12.9–21.9)        | 432 | 25.2 (21.2–29.6)         | 416 | 16.8 (13.6–20.8)         |                                                                      |                 |
| Total comparison                                                                                      | 31  | 25.8 (11.8–44.6)        | 148 | 24.3 (17.7–32.1)         | 185 | 19.5 (14.0–25.9)         |                                                                      |                 |
| Total overall                                                                                         | 319 | 17.9 (13.8–22.5)        | 580 | 25.0 (21.5–28.7)         | 601 | 17.6 (14.7–20.9)         |                                                                      |                 |
| <b>Prevalence of syphilis in women 15–49 years</b>                                                    |     |                         |     |                          |     |                          | no data for 2011                                                     |                 |
| Total impacted                                                                                        |     | n/m                     | 411 | 4.4 (2.6–6.8)            | 416 | 5.3 (3.3–7.9)            |                                                                      |                 |
| Total comparison                                                                                      |     | n/m                     | 131 | 3.8 (1.6–8.7)            | 185 | 3.8 (1.5–7.6)            |                                                                      |                 |
| Total overall                                                                                         |     | n/m                     | 542 | 4.2 (2.7–6.3)            | 601 | 4.8 (3.3–6.9)            |                                                                      |                 |

BHS, baseline health survey; CI, confidence interval; FUHS, follow-up health survey; Hb, haemoglobin; n/m, not measured
